# Supplementary material for: A Metagenomic Analysis Provides a Culture-Independent Pathogen Detection for Atopic Dermatitis
Source: PubMed Central journal article supplement — Allergy Asthma Immunol Res. 2017 Jun 7;9(5):453–61. doi: 10.4168/aair.2017.9.5.453 (PMC5500701; doi:10.4168/aair.2017.9.5.453), 2017-06-07
Supplement: aair-9-453-s003.pdf [file aair-9-453-s003.pdf]

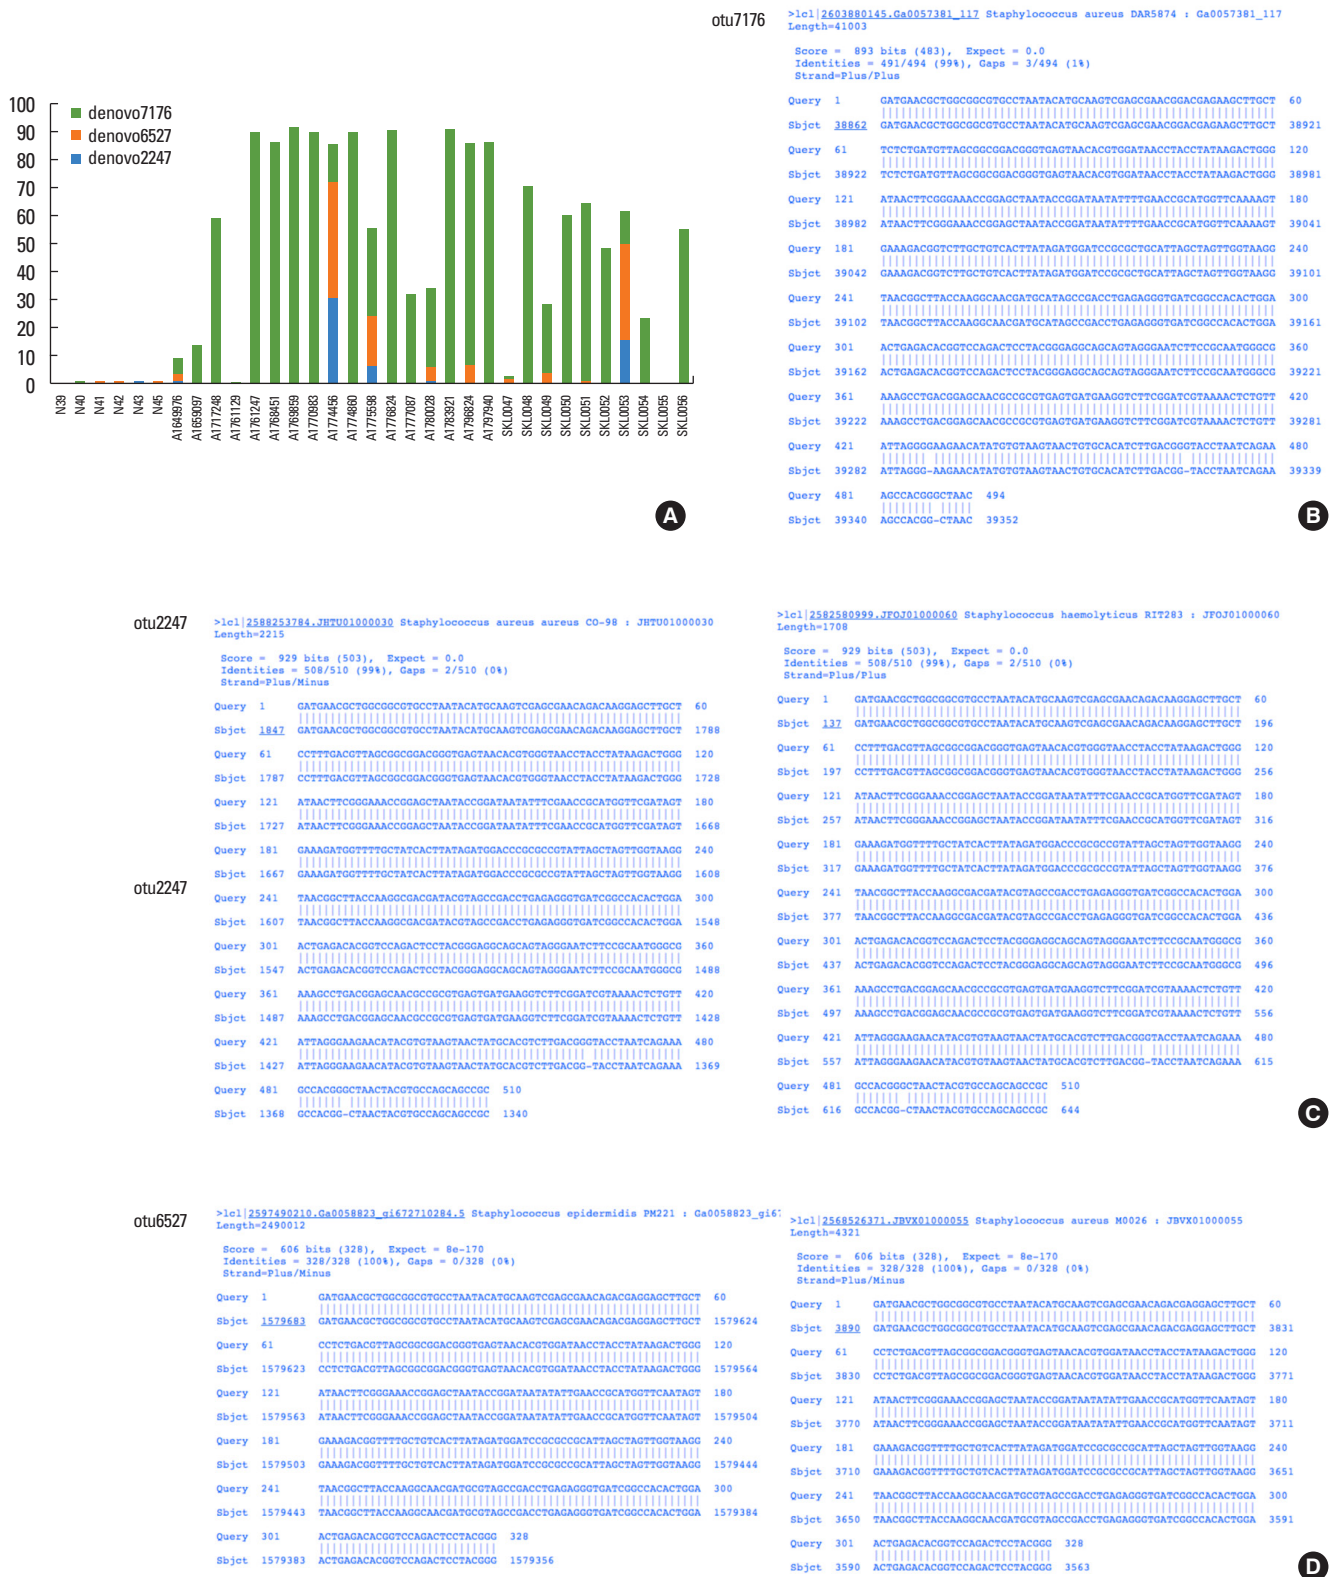

**Supplementary Fig. 3.** Species analysis of *Staphylococcus* genus. (A) Most of the *Staphylococcal* genus in AD patients were *S. aureus*, with a minority being *S. haemolyticus* and *S. epidermidis*. (B) Identification of OTU7176 as *Staphylococcus aureus*. (C) Identification of OTU2247 as *Staphylococcus haemolyticus*. (D) Identification of OTU6527 as *Staphylococcus epidermidis*. AD, atopic dermatitis; OTU, Operational Taxonomy Unit.
